# Supplementary material for: High Serum PD-L1 Levels Are Associated with Poor Survival in Urothelial Cancer Patients Treated with Chemotherapy and Immune Checkpoint Inhibitor Therapy
Source: MDPI journal article supplement (doi:10.3390/cancers13112548), 2021-05-22
Supplement: s1 [file s1]

## Supplementary Materials

# High Serum PD-L1 Levels are Associated with Poor Survival in Urothelial Cancer Patients Treated with Chemotherapy and Immune Checkpoint Inhibitor Therapy

Ulrich Krafft, Csilla Olah, Henning Reis, Claudia Kesch, Christopher Darr, Viktor Grünwald, Stephan Tschirdewahn, Boris Hadaschik, Orsolya Horvath, Istvan Kenessey, Peter Nyirady, Melinda Varadi, Orsolya Modos, Anita Csizmarik and Tibor Szarvas

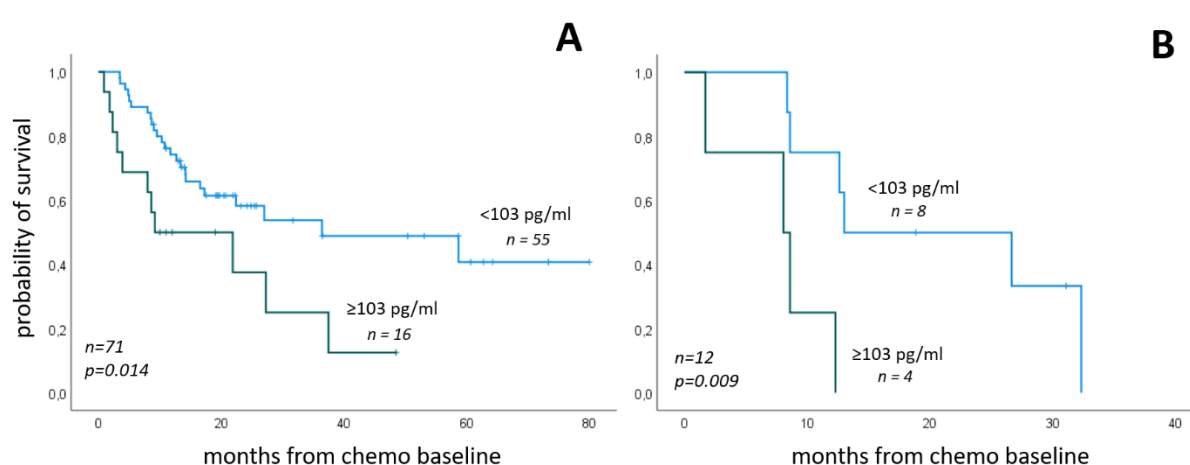

**Figure S1.** Overall survival stratified by pretreatment sPD-L1 levels in the subgroup of patients without distant metastasis (M0) (a) and with distant metastasis at the baseline of chemotherapy (M1) (b).

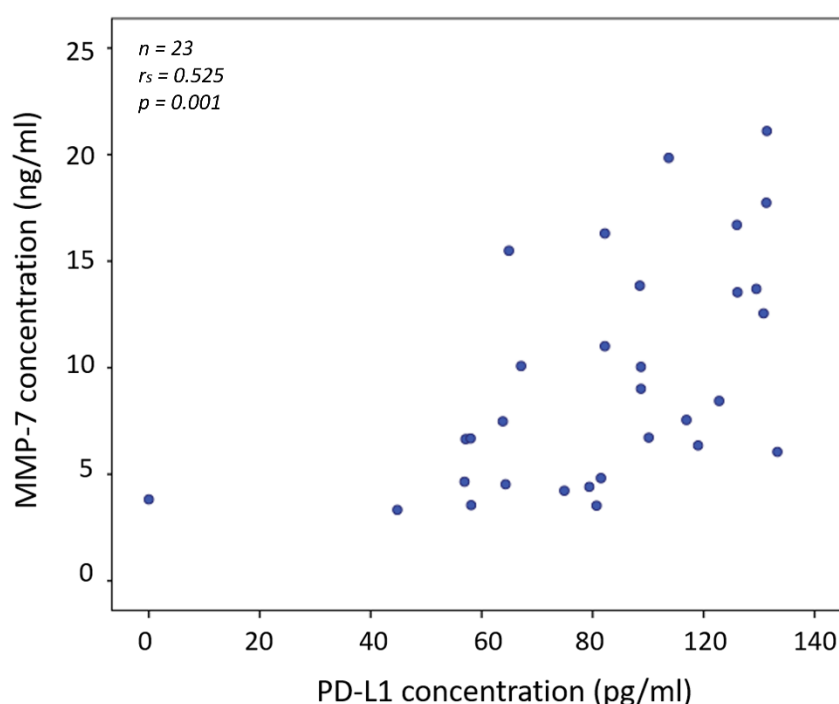

**Figure S1.** Correlation analysis between serum PD-L1 and MMP-7.

**Table S1.** Clinical characteristics in platinum-treated patients. ECOG PS- Eastern Cooperative Oncology Group performance status. LN - lymph node metastasis, R - positive surgical margin, RC - cystectomy, Gem/Cis - gemcitabine + cisplatin, Gem/Carbo -gemcitabine + carboplatin, ICI - immune checkpoint inhibitor.

| variables                               | whole chemo cohort | neoadjuvant         | adjuvant           | palliative          |
|-----------------------------------------|--------------------|---------------------|--------------------|---------------------|
|                                         | <i>n</i> (%)       | <i>n</i> (%)        | <i>n</i> (%)       | <i>n</i> (%)        |
| Total number of patients                | 83                 | 22                  | 33                 | 28                  |
| Age at baseline median [range]          | 67 [41-81]         | 68 [48-74]          | 66 [41-80]         | 68 [48-81]          |
| Gender                                  |                    |                     |                    |                     |
| male                                    | 64 (77)            | 16 (73)             | 25 (76)            | 23 (82)             |
| female                                  | 19 (33)            | 6 (27)              | 8 (24)             | 5 (18)              |
| ECOG PS at enrollment                   |                    |                     |                    |                     |
| 0                                       | 48 (58)            | 8 (36)              | 27 (82)            | 13 (46)             |
| 1                                       | 32 (37)            | 14 (64)             | 6 (18)             | 12 (43)             |
| 2                                       | 3 (3)              | 0 (0)               | 0 (0)              | 3 (11)              |
| Cystectomy data                         |                    |                     |                    |                     |
| Cystectomy performed                    | 59 (71)            | 22 (100)            | 33 (100)           | 4 (14)              |
| pT0                                     | 3 (5)              | 3 (14)              | 0 (0)              | -                   |
| pT1                                     | 2 (3)              | 2 (9)               | 0 (0)              | -                   |
| pT2                                     | 11 (19)            | 3 (14)              | 6 (18)             | 2 (7)               |
| pT3                                     | 30 (51)            | 10 (45)             | 19 (58)            | 1 (4)               |
| pT4                                     | 12 (20)            | 3 (14)              | 8 (24)             | 1 (4)               |
| n.a.                                    | 1                  | 1                   | 0                  | 0                   |
| R                                       | 10 (17)            | 0 (0)               | 10 (30)            | 0                   |
| LN metastasis at RC                     | 30 (51)            | 5 (23)              | 25 (76)            | 0                   |
| Chemo baseline data                     |                    |                     |                    |                     |
| LN at baseline                          | 36 (43)            | 5 (23)              | 27 (82)            | 4 (14)              |
| Distant metastasis at baseline          | 12 (15)            | 0 (0)               | 0 (0)              | 12 (43)             |
| Soft tissue lesions (lung/liver)        | 9 (11)             | 0 (0)               | 0 (0)              | 9 (32)              |
| Bone metastasis                         | 3 (3)              | 0 (0)               | 0 (0)              | 3 (11)              |
| Chemotherapy regimen                    |                    |                     |                    |                     |
| Gem/Cis                                 | 61 (73)            | 16 (73)             | 29 (88)            | 12 (43)             |
| Gem/Carbo                               | 22 (27)            | 6 (27)              | 4 (12)             | 16 (57)             |
| Atezolizumab                            | -                  | -                   | -                  | -                   |
| Pembrolizumab                           | -                  | -                   | -                  | -                   |
| Number of cycles median (range)         | 3 (1-9)            | 3 (1-6)             | 3 (1-9)            | 3 (1-6)             |
| single (only one series)                | 9                  | 1                   | 2                  | 6                   |
| Number of patients died (%)             | 45 (54)            | 7 (32)              | 20 (61)            | 18 (64)             |
| Follow-up time in months median (range) | 14 (1-80)          | 15 (5-48)           | 19 (2-80)          | 12 (1-73)           |
| PD-L1 serum levels                      |                    |                     |                    |                     |
| PD-L1 median (range) baseline [pg/ml]   | 83.0 (0.0 - 781)   | 93.6 (32.4 - 324.0) | 80.7 (0.0 - 158.5) | 83.6 (25.8 - 780.9) |

PD-L1 median (range) 2-3 cycle [pg/ml]      78.5 (0.0 - 273.1)      88.3 (0.0 - 273.1)      76.2 (44.9 - 134.4)      77.9 (38.7 - 261.2)

**Table S2.** Correlation of pretreatment sPD-L1 levels (pg/ml) with clinicopathological parameters in platinum-treated patients. ECOG—Eastern Cooperative Oncology Group performance status, LN – lymph node metastasis, M – distant metastasis, ICI – immune checkpoint inhibitor. In the ICI cohort, due to the small number of cases no Cox regression analysis could be performed. Bold printed p-values were significant (<0.05).

| variables           | whole chemo cohort |                   |              | neoadjuvant |                     |              | adjuvant |                   |       | palliative |                   |       | ICI cohort |                   |   |
|---------------------|--------------------|-------------------|--------------|-------------|---------------------|--------------|----------|-------------------|-------|------------|-------------------|-------|------------|-------------------|---|
|                     | n                  | median (range)    | P            | n           | median (range)      | P            | n        | median (range)    | P     | n          | median (range)    | P     | n          | median (range)    | P |
| Age                 |                    |                   |              |             |                     |              |          |                   |       |            |                   |       |            |                   |   |
| ≤ 65                | 35                 | 82.2 (0.0-780.9)  | 0.43         | 8           | 93.6 (32.4-324.0)   | 0.946        | 16       | 76.8 (0.0-158.5)  | 0.815 | 11         | 74.9 (25.8-780.9) | 0.323 | 3          | 86.6 (59.0-169.0) | - |
| > 65                | 48                 | 84.0 (35.8-243.1) |              | 14          | 89.7 (46.0-194.9)   |              | 17       | 80.7 (40.5-136.8) |       | 17         | 85.5 (35.8-243.1) |       | 9          | 93.3 (25.3-145.0) |   |
| Sex                 |                    |                   |              |             |                     |              |          |                   |       |            |                   |       |            |                   |   |
| Male                | 64                 | 84.0 (0.0-780.9)  | 0.435        | 16          | 87.0 (32.4-324.0)   | 0.606        | 25       | 80.0 (0.0-136.8)  | 0.275 | 23         | 85.5 (25.8-780.9) | 0.697 | 10         | 94.2 (59.0-169.0) | - |
| Female              | 19                 | 82.2 (40.5-194.9) |              | 6           | 100.3 (41.9-194.9)  |              | 8        | 91.5 (40.5-158.5) |       | 5          | 82.2 (48.0-154.8) |       | 2          | 26.1 (25.3-26.89) |   |
| ECOG                |                    |                   |              |             |                     |              |          |                   |       |            |                   |       |            |                   |   |
| 0                   | 48                 | 80.4 (0.0-158.5)  | <b>0.007</b> | 8           | 71.2 (32.4 - 111.4) | 0.101        | 27       | 67.1 (0.0-158.5)  | 0.1   | 13         | 81.0 (25.8-111.3) | 0.214 | 10         | 91.9 (26.9-169.0) | - |
| 1-2                 | 35                 | 96.2 (35.8-780.9) |              | 14          | 97.0 (41.9-324.0)   |              | 6        | 91.9 (79.4-136.8) |       | 15         | 95.9 (35.8-780.9) |       | 2          | 59.3 (25.3-93.3)  |   |
| Stage at cystectomy |                    |                   |              |             |                     |              |          |                   |       |            |                   |       |            |                   |   |
| pT0-pT2             | 16                 | 84.7 (32.4-194.9) | 0.741        | 8           | 86.9 (32.4-194.9)   | <b>0.001</b> | 6        | 89.4 (52.3-109.5) | 0.692 | 2          | -                 | -     | 2          | 56.8 (26.9-86.6)  | - |
| pT3-pT4             | 42                 | 80.4 (0.0-324.0)  |              | 13          | 96.2 (41.9-324.0)   |              | 27       | 80.0 (0.0-158.5)  |       | 2          | -                 | -     | 6          | 97.2 (59.0-169.0) |   |
| LN / M status       |                    |                   |              |             |                     |              |          |                   |       |            |                   |       |            |                   |   |
| N0/M0               | 38                 | 87.0 (38.5-324.0) | 0.209        | 17          | 97.0 (41.9-324.0)   | 0.322        | 6        | 84.7 (67.1-102.2) | 0.469 | 15         | 85.5 (38.5-189.5) | 0.818 | 2          | 87.1 (80.9-93.3)  | - |
| N+ or M+            | 45                 | 80.7 (0.0-780.9)  |              | 5           | 91.0 (32.4-114.8)   |              | 27       | 79.4 (0.-158.5)   |       | 13         | 80.7 (25.8-780.9) |       | 10         | 90.9 (25.3-169.0) |   |

**Table 3.** Cox univariate OS analysis in treatment subgroups of platinum-treated patients. ECOG - Eastern Cooperative Oncology Group, LN – lymph node metastasis, M – distant metastasis. Ref – referent. Bold p-values were <0.05. In the ICI cohort, due to the small case numbers no Cox analysis could be performed. Bold printed p-values were significant (<0.05).

| variables                   | whole chemo cohort |       |               |              | neoadjuvant |       |                |              | adjuvant |       |                |              | palliative |       |                |              |
|-----------------------------|--------------------|-------|---------------|--------------|-------------|-------|----------------|--------------|----------|-------|----------------|--------------|------------|-------|----------------|--------------|
|                             | n                  | HR    | 95% CI        | P            | n           | HR    | 95% CI         | P            | n        | HR    | 95% CI         | P            | n          | HR    | 95% CI         | P            |
| Age                         |                    |       |               |              |             |       |                |              |          |       |                |              |            |       |                |              |
| ≤ 65                        | 35                 | ref.  |               |              | 8           | ref.  |                |              | 16       | ref.  |                |              | 11         | ref.  |                |              |
| > 65                        | 48                 | 1.297 | 0.716 - 2.351 | 0.391        | 14          | 0.382 | 0.071 - 2.042  | 0.26         | 17       | 1.115 | 0.463 - 2.686  | 0.808        | 17         | 4.165 | 1.158 - 14.974 | <b>0.029</b> |
| Gender                      |                    |       |               |              |             |       |                |              |          |       |                |              |            |       |                |              |
| Male                        | 64                 | ref.  |               |              | 16          | ref.  |                |              | 25       | ref.  |                |              | 23         | ref.  |                |              |
| Female                      | 19                 | 0.815 | 0.392 - 1.694 | 0.584        | 6           | 0.344 | 0.041 - 2.915  | 0.328        | 8        | 1.268 | 0.458 - 3.110  | 0.647        | 5          | 0.695 | 0.197 - 2.447  | 0.571        |
| ECOG                        |                    |       |               |              |             |       |                |              |          |       |                |              |            |       |                |              |
| 0                           | 48                 | ref.  |               |              | 8           | ref.  |                |              | 27       | ref.  |                |              | 13         | ref.  |                |              |
| 1-2                         | 35                 | 2.615 | 1.381 - 4.950 | <b>0.003</b> | 14          | 2.703 | 0.490 - 14.913 | <b>0.254</b> | 6        | 3.032 | 1.043 - 8.814  | <b>0.042</b> | 15         | 3.33  | 1.137 - 9.752  | <b>0.028</b> |
| Stage at cystectomy         |                    |       |               |              |             |       |                |              |          |       |                |              |            |       |                |              |
| T0-T2                       | 14                 | ref.  |               |              | 8           | ref.  |                |              | 6        | ref.  |                |              |            | ref.  |                |              |
| T3-T4                       | 40                 | 1.135 | 0.483 - 2.664 | 0.772        | 13          | 2.964 | 0.345 - 25.484 | 0.322        | 27       | 0.926 | 0.308 - 1.778  | 0.89         |            | -     | -              | -            |
| LN / M status               |                    |       |               |              |             |       |                |              |          |       |                |              |            |       |                |              |
| N0/M0                       | 38                 | ref.  |               |              | 17          | ref.  |                |              | 6        | ref.  |                |              | 15         | ref.  |                |              |
| N+ or M+                    | 45                 | 1.914 | 1.017-3.601   | <b>0.044</b> | 5           | 1.583 | 0.289 - 8.682  | 0.597        | 27       | 2.708 | 0.625 - 11.741 | 0.183        | 13         | 2.182 | 0.802 - 5.934  | 0.127        |
| PD-L1 serum cc. / upper 25% |                    |       |               |              |             |       |                |              |          |       |                |              |            |       |                |              |
| < 103 pg/ml                 | 63                 | ref.  |               |              | 16          | ref.  |                |              | 27       | ref.  |                |              | 20         | ref.  |                |              |
| ≥ 103 pg/ml                 | 20                 | 1.381 | 1.120 - 1.703 | <b>0.002</b> | 6           | 0.746 | 0.364 - 1.530  | 0.424        | 6        | 1.577 | 1.134 - 2.192  | <b>0.007</b> | 8          | 1.51  | 1.095 - 2.083  | <b>0.012</b> |
| PD-L1 serum cc. / median    |                    |       |               |              |             |       |                |              |          |       |                |              |            |       |                |              |
| < 83 pg/ml                  | 42                 | ref.  |               |              | 10          | ref.  |                |              | 18       | ref.  |                |              | 14         | ref.  |                |              |
| ≥ 83 pg/ml                  | 41                 | 1.989 | 1.099 - 3.600 | <b>0.023</b> | 12          | 0.857 | 0.187 - 3.916  | 0.842        | 15       | 1.684 | 0.698 - 4.062  | 0.246        | 14         | 4.234 | 1.537 - 11.667 | <b>0.005</b> |
